# Supplementary material for: Macroemulsion-mediated synthesis of fibrous ZnO microrods and their surface morphology contribution to the high photocatalytic degradation rate
Source: Royal Society of Chemistry journal article supplement (doi:10.1039/d2nj04862k), 2022-11-22
Supplement: d2nj04862k1.pdf [file d2nj04862k1.pdf]

## Electronic Supplementary Information

# Macroemulsion-Mediated Synthesis of Fibrous ZnO Microrods and Their Surface Morphology Contribution on The High Photocatalytic Degradation Rate

Didi Prasetyo Benu<sup>a,b,c</sup>, Amelia Andriani<sup>b,d</sup>, Nadiatus Silmi<sup>a,b</sup>, Fry Voni Steky<sup>a,b</sup>, Fainan Failamani<sup>b</sup>, Brian Yulianto<sup>e,f</sup>, Rino Rakhmata Mukti<sup>b,f,g</sup>, and Veinardi Suendo<sup>b,f\*</sup>

- a. *Doctoral Program of Chemistry, Faculty of Mathematics and Natural Sciences, Institut Teknologi Bandung, Bandung 40132, Indonesia.*
- b. *Division of Inorganic and Physical Chemistry, Faculty of Mathematics and Natural Sciences, Institut Teknologi Bandung, Bandung 40132, Indonesia.*
- c. *Department of Chemistry, Universitas Timor, Kefamenanu 85613, Indonesia.*
- d. *Department of Pharmacy, Sekolah Tinggi Ilmu Kesehatan Adila, Bandar Lampung 35144, Indonesia.*
- e. *Advanced Functional Materials (AFM) Laboratory, Engineering Physics Department, Institut Teknologi Bandung, 10 Ganesha Street, Bandung 40132, Indonesia.*
- f. *Research Center for Nanosciences and Nanotechnology, Institut Teknologi Bandung, Bandung 40132, Indonesia.*
- g. *Center for Catalysis and Reaction Engineering, Institut Teknologi Bandung, Bandung 40132, Indonesia.*

\*Corresponding author: [vsuendo@chem.itb.ac.id](mailto:vsuendo@chem.itb.ac.id)

**Table S1.** The pH of the polar phase of mixture before and after solvothermal process

| Sample name | pH                  |                    |
|-------------|---------------------|--------------------|
|             | Before solvothermal | After solvothermal |
| ZnO_Ac_U0   | 11.38               | 11.40              |
| ZnO_Ac_U0.5 | 11.48               | 11.50              |
| ZnO_Ac_U1   | 11.62               | 11.60              |
| ZnO_Ac_U2   | 11.70               | 11.69              |

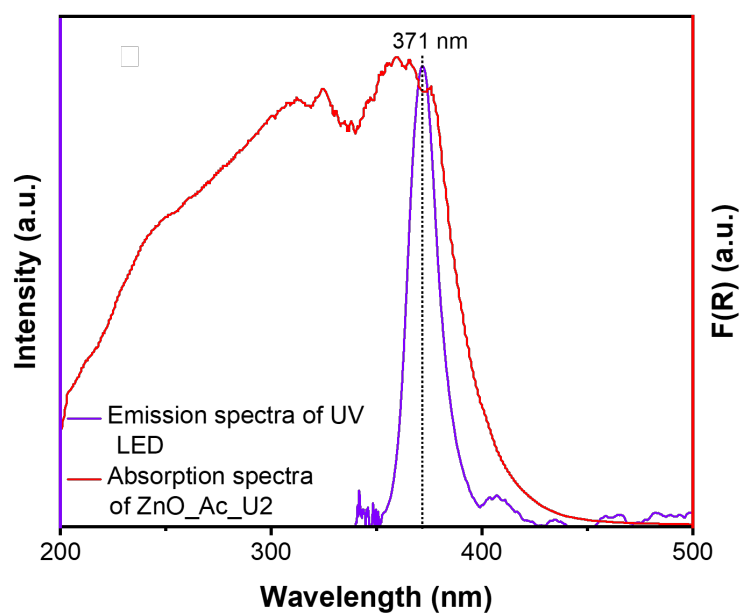

**Figure S1.** The comparison between the ZnO\_Ac\_U2 absorption spectra and the UV LED emission spectra.

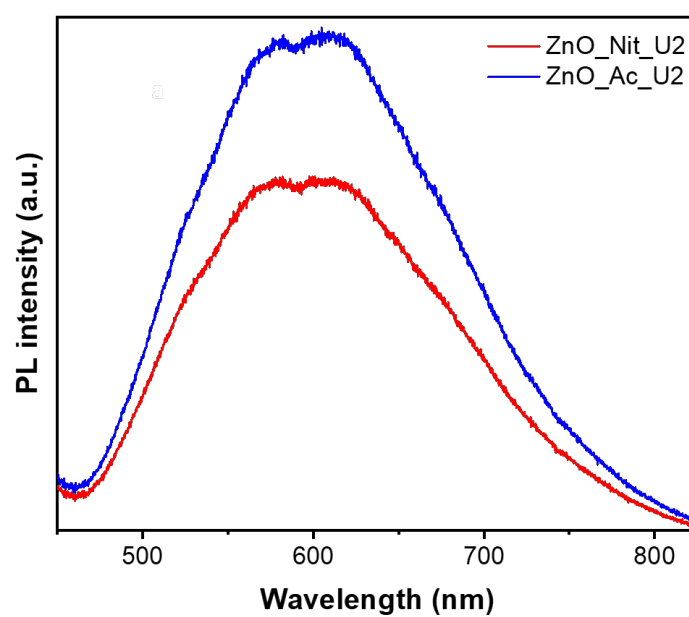

**Figure S2.** PL spectra of synthesized ZnO samples in terms of wavelength.

**Table S2.** Deconvoluted peaks properties of PL spectra for ZnO\_Nit\_U2 and ZnO\_Ac\_U2 samples

| Sample name | Peak Properties        |             |           |                    |
|-------------|------------------------|-------------|-----------|--------------------|
|             | Centre max. (eV)/color | Area (a.u.) | FWHM (eV) | Max. height (a.u.) |
| ZnO_Nit_U2  | 1.65/Red               | 245208      | 0.17      | 1350859            |
|             | 1.82/Red               | 1110028     | 0.22      | 4823546            |
|             | 1.99/Orange            | 1388031     | 0.21      | 6083645            |
|             | 2.15/Yellow            | 946569      | 0.22      | 4034125            |
|             | 2.32/Green             | 1190140     | 0.33      | 3437336            |
| ZnO_Ac_U2   | 1.65/Red               | 281422      | 0.16      | 1606794            |
|             | 1.82/Red               | 1685248     | 0.23      | 6944802            |
|             | 1.99/Orange            | 1932891     | 0.21      | 8471705            |
|             | 2.15/Yellow            | 1350656     | 0.22      | 5756229            |
|             | 2.32/Green             | 1546678     | 0.32      | 4467025            |

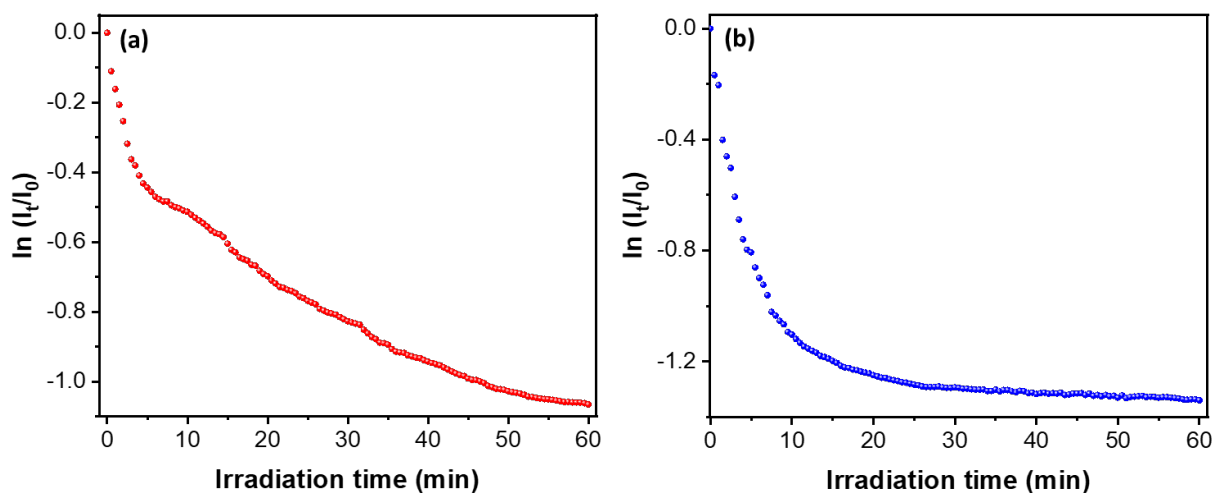

**Figure S3.** First-order kinetic plot for photocatalytic degradation of rhodamine B with uncondensed x-axis; (a) ZnO\_Nit\_U2, (b), ZnO\_Ac\_U2.

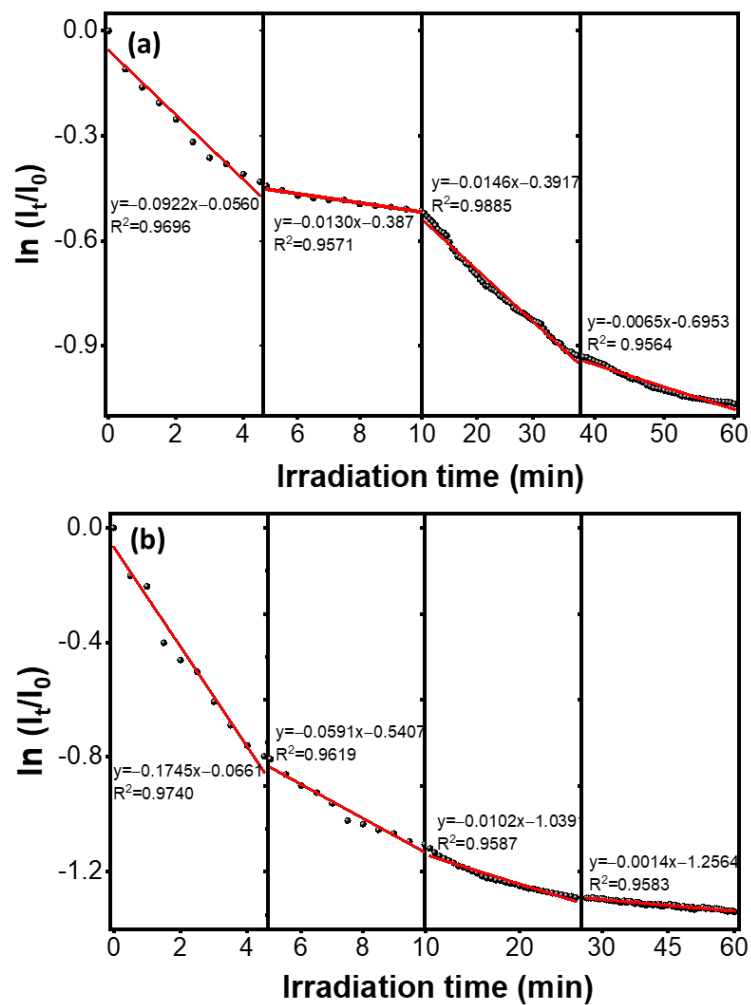

**Figure S4.** First-order kinetic plot and the detail parameters of the linear fitting.

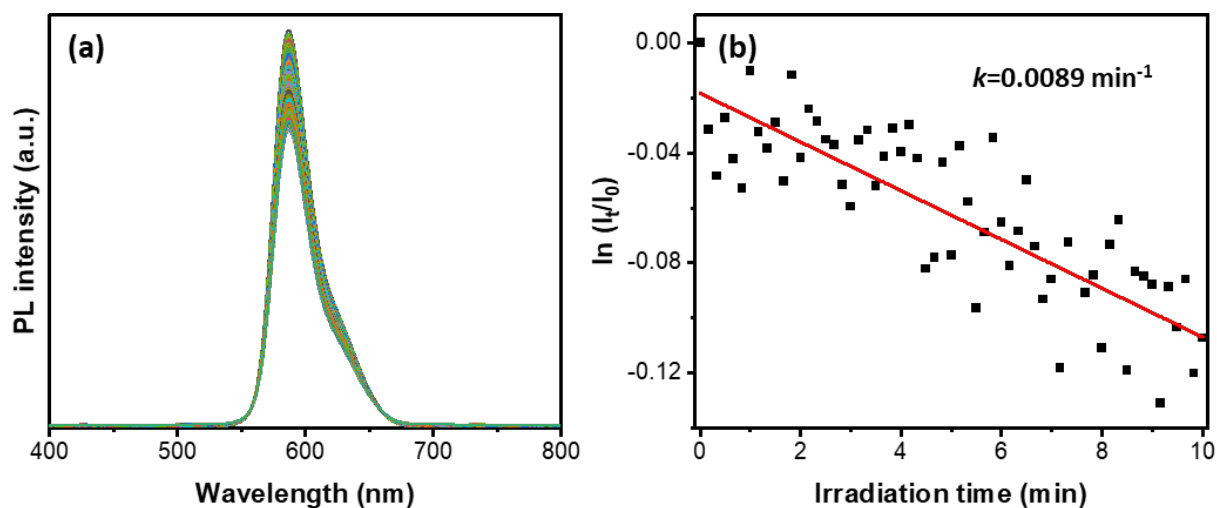

**Figure S5.** The experimental data of rhodamine B photodegradation without ZnO photocatalyst; (a) PL spectra, (b) first-order kinetic plot.

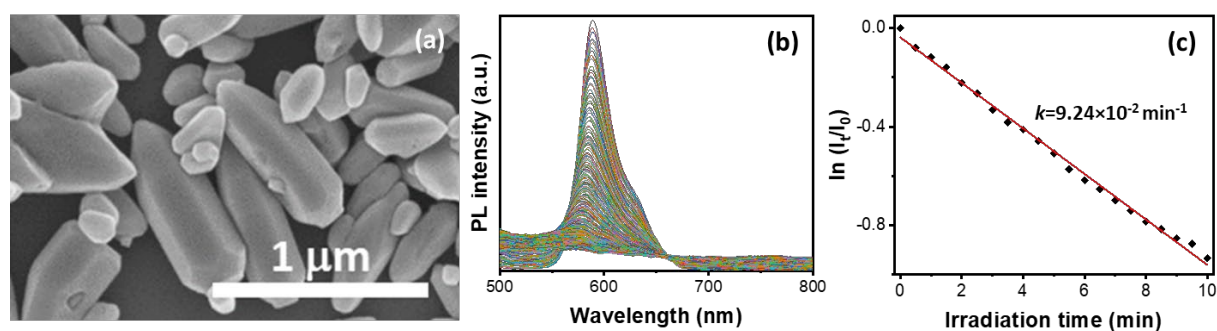

**Figure S6.** (a) SEM image of smooth ZnO nanorods, (b) evolution of PL intensity during the photocatalytic degradation when using smooth ZnO nanorods as photocatalyst, (c) the corresponding first-order kinetic plot.

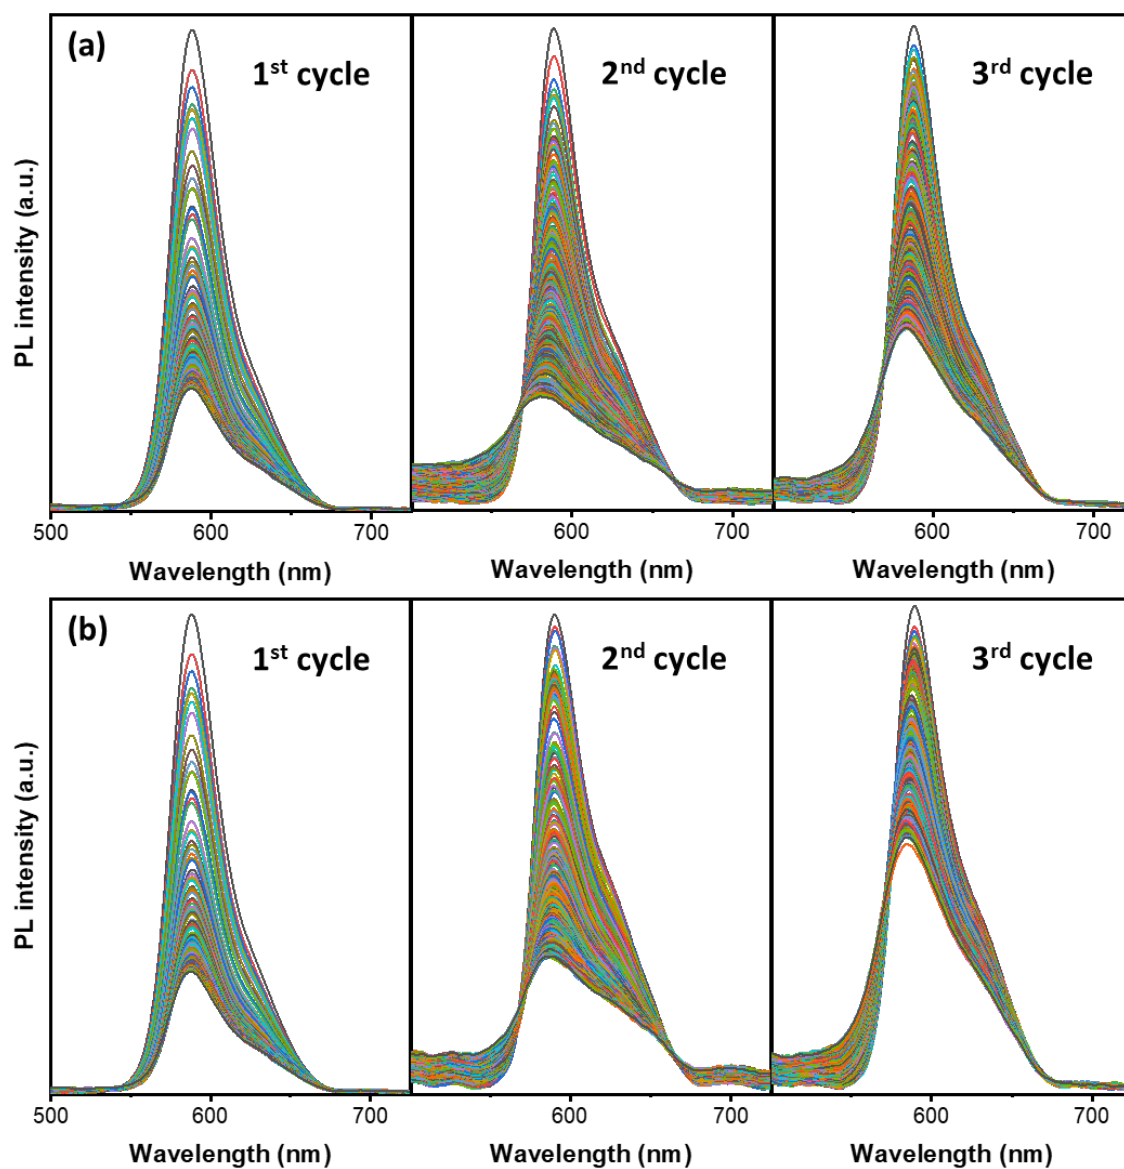

**Figure S7.** Evolution of PL intensity for the reusability test of ZnO photocatalyst; (a) ZnO\_Ac\_U2, (b) ZnO\_Nit\_U2.
